# Supplementary material
Source: PubMed Central journal article supplement (PMC3297989)
Supplement: emboj2011478s2.pdf [file emboj2011478s2.pdf]

Manuscript EMBO-2011-79889

## **Akt-dependent Skp2 mRNA translation is required for exiting contact inhibition, oncogenesis, and adipogenesis**

Veronique Nogueira, Deepa Sundararajan, Jennifer M. Kwan, Xiao-ding Peng, Neha Sarvepalli, Nahum Sonenberg, and Nissim Hay

*Corresponding author: Nissim Hay, Univ of Illinois*

---

### **Review timeline:**

Submission date:  
Accepted:

20 October 2011  
06 December 2011

---

### **Transaction Report:**

No Review Process File is available with this article, as the authors have chosen not to make the review process public in this case
